# Supplementary material
Source: MDPI journal article supplement (https://www.mdpi.com/2076-3417/12/2/751)
Supplement: s1 [file s1]

## SUPPLEMENTARY DOCUMENTATION

### Details of the high-intensity training session

The training session when the players were analyzed was one of the typical session that the team conducted through the session.

9 players participated in the training, despite only 7 were analyzed, since the other 2 did not meet the inclusion criteria.

The total amount of the session lasted 2 hour and a half approximately. The session was divided in three parts: Warm-up, main part and cooling down.

The purposes of the training session were:

- 3 x 1
- Possession
- Transition to side entry

Players rested 2 minutes between exercises and 1 minute between series of the same exercise.

| 23' (including rests) |                                                                                                                                                                         | WARM – UP |                                                                                     |  |                                                                                       |
|-----------------------|-------------------------------------------------------------------------------------------------------------------------------------------------------------------------|-----------|-------------------------------------------------------------------------------------|--|---------------------------------------------------------------------------------------|
| 10'                   | <b>INDIVIDUAL TECHNIQUE (Figure 1)</b> <ul style="list-style-type: none"><li>• Free skating [1]</li><li>• Possession 4 vs 4 + 1 joker (half of the pitch) [2]</li></ul> |           |                                                                                     |  |                                                                                       |
| 6'                    | <b>INDIVIDUAL TECHNIQUE (Figure 2)</b> <ul style="list-style-type: none"><li>• Return the ball to 8 + 1 teammate dragging</li></ul>                                     |           |                                                                                     |  |                                                                                       |
| 5'                    | <b>WARMING-UP GOALKEEPER + INDIVIDUAL TECHNIQUE (Figure 3)</b> <ul style="list-style-type: none"><li>• Free shot prior to technical gesture</li></ul>                   |           |                                                                                     |  |                                                                                       |
|                       | 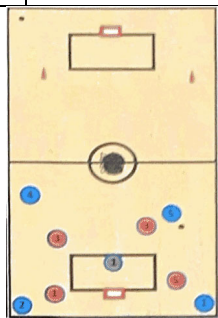                                                                                     |           |  |  |  |
|                       | Figure 1                                                                                                                                                                |           | Figure 2                                                                            |  | Figure 3                                                                              |

| 110' (including rests) |                                                                                                                                                                                                                                                | MAIN PART |  |
|------------------------|------------------------------------------------------------------------------------------------------------------------------------------------------------------------------------------------------------------------------------------------|-----------|--|
| 4 x 5'<br>[1,2,1,2]    | <b>INDIVIDUAL TECHNIQUE (Figure 4)</b> <ul style="list-style-type: none"><li>• Forcing in the rotation of 3 to drop + Ball up by diagonal + Shot [1]</li><li>• Transition to side entry + shot (Another half pitch) [2]</li></ul>              |           |  |
| 2 x 7'                 | <b>INDIVIDUAL TECHNIQUE (Figure 5)</b> <ul style="list-style-type: none"><li>• Passing + go through the fence. 1 vs 1 (Half pitch)</li><li>• 1 teammate in another half-pitch</li><li>• + 2 vs 1 (1 v 1 attacker now defends 2 vs 1)</li></ul> |           |  |
| 2 x 7'                 | <b>COLLECTIVE TACTICS (Figure 6)</b> <ul style="list-style-type: none"><li>• Looking for side entry</li></ul>                                                                                                                                  |           |  |

|                                                                                     |                                                                                                                                                                                                     |  |
|-------------------------------------------------------------------------------------|-----------------------------------------------------------------------------------------------------------------------------------------------------------------------------------------------------|--|
| 2 x 7'                                                                              | <b>POSSESSING TASK (Figure 7)</b> <ul style="list-style-type: none"><li>• 4 vs 4. 7 static + 1 open</li><li>• Go to the goal + transition/counter-attack. Attack 4 vs 4 + 1 counterattack</li></ul> |  |
| 4 x 7'                                                                              | <b>SIMULATION MATCH (Figure 8)</b> <ul style="list-style-type: none"><li>• 4 vs 4</li><li>• 5 minutes break between the second and the third match.</li></ul>                                       |  |
| 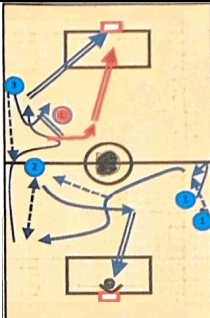   |                                                                                                                                                                                                     |  |
| <b>Figure 4</b>                                                                     |                                                                                                                                                                                                     |  |
|    |                                                                                                                                                                                                     |  |
| <b>Figure 5</b>                                                                     |                                                                                                                                                                                                     |  |
|  |                                                                                                                                                                                                     |  |
| <b>Figure 6</b>                                                                     |                                                                                                                                                                                                     |  |
|   |                                                                                                                                                                                                     |  |
| <b>Figure 7</b>                                                                     |                                                                                                                                                                                                     |  |
|   |                                                                                                                                                                                                     |  |
| <b>Figure 8</b>                                                                     |                                                                                                                                                                                                     |  |

| 17' (including rests) |   | COOLING DOWN                    |
|-----------------------|---|---------------------------------|
| 5'                    | • | Free shooting to the goalkeeper |
| 5'                    | • | Stretching                      |
| 5'                    | • | Foam rolling                    |
